# Supplementary material for: Efficient Anthocyanin Recovery from Black Bean Hulls Using Eutectic Mixtures: A Sustainable Approach for Natural Dye Development
Source: MDPI journal article supplement (doi:10.3390/foods13091374), 2024-04-29
Supplement: s1 [file s1]

## Supplementary Materials

**Table S1.** Penalty points to calculate the Green Certificate and E-factor value for anthocyanin-rich extract and its cryoconcentrate from broken black bean hulls.

| Product                  | Solvent       |               |                 |                 |               | Energy            |                 | Waste           | Total<br>PPs | Green<br>Certificate | E-<br>factor |
|--------------------------|---------------|---------------|-----------------|-----------------|---------------|-------------------|-----------------|-----------------|--------------|----------------------|--------------|
|                          | Type          | Quantity (mL) | PP <sub>Q</sub> | PP <sub>H</sub> | Subtotal (PP) | Consumption (kWh) | PP <sub>E</sub> | PP <sub>W</sub> |              |                      |              |
| Anthocyanin-rich extract | Water and DES | 15            | 1               | 1               | 1.41          | 0.09              | 1               | 0.37            | 2.79         | 97.21                | 268.16       |
| Cryoconcentrate 1        | Water and DES | 15            | 1               | 1               | 1.41          | 3.72              | 3               | 0.92            | 5.34         | 94.66                | 1432.30      |
| Cryoconcentrate 2        | Water and DES | 15            | 1               | 1               | 1.41          | 7.36              | 4               | 1.27            | 6.69         | 93.31                | 3477.33      |
| Cryoconcentrate 3        | Water and DES | 15            | 1               | 1               | 1.41          | 10.99             | 5               | 1.36            | 7.78         | 92.22                | 4856.36      |

PPQ – penalty point for solvent quantity, PPH – penalty point for solvent hazard, PPE – penalty point for energy consumption, PPW - penalty point for waste volume, PPS – penalty points.

**Table S2.** Penalty points to calculate the EcoScale for anthocyanin-rich extract and its cryoconcentrate from broken black bean hulls.

| Penalties                   |                  |        |           |        |                    |                          |                            |       |          |  |
|-----------------------------|------------------|--------|-----------|--------|--------------------|--------------------------|----------------------------|-------|----------|--|
| Product                     | Solvent          | Yield* | Cost<br>s | Safety | Technical<br>setup | Temperature<br>/<br>time | Workup and<br>purification | Total | EcoScale |  |
|                             |                  |        |           |        |                    |                          |                            |       |          |  |
| Anthocyanin-rich<br>extract | Water and<br>DES | 12.71  | 0         | 5      | 2                  | 2                        | 0                          | 1     | 78.29    |  |
| Cryoconcentrate 1           | Water and<br>DES | 12.71  | 3         | 5      | 7                  | 5                        | 1                          | 1     | 66.29    |  |
| Cryoconcentrate 2           | Water and<br>DES | 12.71  | 5         | 5      | 7                  | 5                        | 1                          | 1     | 64.29    |  |
| Cryoconcentrate 3           | Water and<br>DES | 12.71  | 5         | 5      | 7                  | 5                        | 1                          | 1     | 64.29    |  |

Yield – [100-%anthocyanin recovered]/2, being % recovered in relation to maximum anthocyanin reported in the literature (4.8 mg/g) [10].
